# Supplementary material for: Genetic and Cortical Cell-Type Liability Architecture of Autism
Source: Research Square preprint supplement (doi:10.21203/rs.3.rs-8321464/v1), 2026-02-13
Supplement: Supplementary file 2 [file eba034804a01c00f515b6d96.xlsx]

## Sheet: Feuil1
			Sex
			Male	Female	Total
	With ASD	Diagnosis < 6	21172	5658	26830
		Diagnosis > 6	19331	8666	27997
	Without ASD		34078	52421	86499
	Total		74581	66745	141326
